# Supplementary material for: Competing neural representations of choice shape evidence accumulation in humans
Source: eLife journal article supplement (doi:10.7554/elife.85223), 2023-10-11
Supplement: supp1 [file elife-85223-supp1-v2.pdf]

**Simulated**

|     | $\Delta B$ | $\Omega$ | $\Delta DIC_{null}$ | $DIC_{best}$       |
|-----|------------|----------|---------------------|--------------------|
| I   | $v$        | $a$      | $-29.85 \pm 12.76$  | $-4.49 \pm 5.91$   |
| II  | $a$        | $v$      | $-23.94 \pm 22.56$  | $-10.40 \pm 11.22$ |
| III | $-$        | $v$      | $-6.16 \pm 4.24$    | $-28.19 \pm 13.62$ |
| IV  | $v$        | $-$      | $-22.60 \pm 7.28$   | $-11.74 \pm 14.80$ |
| V   | $-$        | $a$      | $-7.04 \pm 11.06$   | $-27.30 \pm 8.16$  |
| VI  | $a$        | $-$      | $-17.72 \pm 21.49$  | $-16.62 \pm 11.88$ |
| VII | $-$        | $-$      | $0.00 \pm 0.00$     | $-34.34 \pm 15.97$ |

**Human**

|     | $\Delta B$ | $\Omega$ | $\Delta DIC_{null}$ | $\Delta DIC_{best}$ |
|-----|------------|----------|---------------------|---------------------|
| I   | $v$        | $a$      | $-14.90 \pm 20.58$  | $-1.52 \pm 1.04$    |
| II  | $a$        | $v$      | $-0.44 \pm 1.11$    | $-15.99 \pm 18.56$  |
| III | $-$        | $v$      | $-1.47 \pm 1.30$    | $-14.96 \pm 18.56$  |
| IV  | $v$        | $-$      | $-13.80 \pm 16.61$  | $-2.63 \pm 3.62$    |
| V   | $-$        | $a$      | $-1.03 \pm 4.46$    | $-15.40 \pm 15.60$  |
| VI  | $a$        | $-$      | $1.00 \pm .071$     | $-17.42 \pm 19.52$  |
| VII | $-$        | $-$      | $0.00 \pm 0.00$     | $-16.43 \pm 19.53$  |

**Supplementary File 1. Model fits.** Group-level Deviance Information Criterion (DIC) values for regression models tested.
