# Supplementary material for: Competing neural representations of choice shape evidence accumulation in humans
Source: eLife journal article supplement (doi:10.7554/elife.85223), 2023-10-11
Supplement: supp2 [file elife-85223-supp2-v2.pdf]

|     | Part. | $\Delta B$ | $\Omega$ | $\Delta DIC_{null}$ | $\Delta DIC_{best}$ |
|-----|-------|------------|----------|---------------------|---------------------|
| I   | 1     | <i>v</i>   | <i>a</i> | 0.61                | -2.32               |
| II  | 1     | <i>a</i>   | <i>v</i> | 0.08                | -1.79               |
| III | 1     | -          | <i>v</i> | -1.71               | 0.00                |
| IV  | 1     | <i>v</i>   | -        | 1.13                | -2.84               |
| V   | 1     | -          | <i>a</i> | -0.36               | -1.35               |
| VI  | 1     | <i>a</i>   | -        | 1.93                | -3.64               |
| VII | 1     | -          | -        | 0.00                | -1.71               |
| I   | 2     | <i>v</i>   | <i>a</i> | -9.91               | -1.73               |
| II  | 2     | <i>a</i>   | <i>v</i> | -0.69               | -10.95              |
| III | 2     | -          | <i>v</i> | -1.17               | -10.47              |
| IV  | 2     | <i>v</i>   | -        | -11.64              | 0.00                |
| V   | 2     | -          | <i>a</i> | 1.89                | -13.52              |
| VI  | 2     | <i>a</i>   | -        | 0.46                | -12.10              |
| VII | 2     | -          | -        | 0.00                | -11.64              |
| I   | 3     | <i>v</i>   | <i>a</i> | -45.08              | 0.00                |
| II  | 3     | <i>a</i>   | <i>v</i> | -1.85               | -43.23              |
| III | 3     | -          | <i>v</i> | -3.07               | -42.01              |
| IV  | 3     | <i>v</i>   | -        | -37.41              | -7.68               |
| V   | 3     | -          | <i>a</i> | -7.53               | -37.55              |
| VI  | 3     | <i>a</i>   | -        | 1.16                | -46.25              |
| VII | 3     | -          | -        | 0.00                | -45.08              |
| I   | 4     | <i>v</i>   | <i>a</i> | -5.23               | -2.05               |
| II  | 4     | <i>a</i>   | <i>v</i> | 0.71                | -7.99               |
| III | 4     | -          | <i>v</i> | -0.07               | -7.35               |
| IV  | 4     | <i>v</i>   | -        | -7.28               | 0.00                |
| V   | 4     | -          | <i>a</i> | 1.90                | -9.18               |
| VI  | 4     | <i>a</i>   | -        | 0.43                | -7.70               |
| VII | 4     | -          | -        | 0.00                | -7.28               |

**Supplementary File 2. Individual Model fits.** Participant-level Deviance Information Criterion (DIC) values for regression models tested.
