# Supplementary material for: Competing neural representations of choice shape evidence accumulation in humans
Source: eLife journal article supplement (doi:10.7554/elife.85223), 2023-10-11
Supplement: supp3 [file elife-85223-supp3-v2.pdf]

| Param.                 | Unit               | Cx  | CxI | dSPN | iSPN | FSI | GPe  | STN  | Thalamus |
|------------------------|--------------------|-----|-----|------|------|-----|------|------|----------|
| $\tau_m$               | ms                 | 20  | 10  | 20   | 20   | 10  | 20   | 20   | 27.78    |
| $V_{\text{rest}}$      | mV                 | -70 | -70 | -70  | -70  | -70 | -70  | -70  | -70      |
| $V_{\text{threshold}}$ | mV                 | -50 | -50 | -50  | -50  | -50 | -50  | -50  | -50      |
| $V_L$                  | mV                 | -55 | -55 | -55  | -55  | -55 | -55  | -55  | -55      |
| $g_T$                  | mS/cm <sup>2</sup> | 0   | 0   | 0    | 0    | 0   | 0.06 | 0.06 | 0        |
| $V_h$                  | mV                 | -60 | -60 | -60  | -60  | -60 | -60  | -60  | -60      |
| $V_T$                  | mV                 | 120 | 120 | 120  | 120  | 120 | 120  | 120  | 120      |
| $\tau_h^-$             | ms                 | 20  | 20  | 20   | 20   | 20  | 20   | 20   | 20       |
| $\tau_h^+$             | ms                 | 100 | 100 | 100  | 100  | 100 | 100  | 100  | 100      |

**Supplementary File 3. Neuronal parameters.** Neuronal parameters for each nucleus are listed in the left column, with values shown on the right. The membrane time constant:  $\tau_m$ , resting membrane potential:  $V_{\text{rest}}$ , threshold potential:  $V_{\text{threshold}}$ , leak reversal:  $V_L$ , low threshold  $\text{Ca}^{2+}$  maximal conductance:  $g_T$ , threshold potential for burst activation:  $V_h$ , reversal potential:  $V_T(\text{Ca}^{2+})$ , burst duration:  $\tau_h^-$ , hyperpolarization duration:  $\tau_h^+$ .
