# Supplementary material for: Competing neural representations of choice shape evidence accumulation in humans
Source: eLife journal article supplement (doi:10.7554/elife.85223), 2023-10-11
Supplement: supp4 [file elife-85223-supp4-v2.pdf]

| Population | Receptor | External input freq. | External input efficacy | No. external connections |
|------------|----------|----------------------|-------------------------|--------------------------|
| CxI        | AMPA     | 3.7                  | 1.2                     | 640                      |
| Cx         | AMPA     | 2.3                  | 2.0                     | 800                      |
| dSPN       | AMPA     | 1.3                  | 4.0                     | 800                      |
| iSPN       | AMPA     | 1.3                  | 4.0                     | 800                      |
| FSI        | AMPA     | 3.6                  | 1.55                    | 800                      |
| GPi        | AMPA     | 0.8                  | 5.9                     | 800                      |
| GPe        | AMPA     | 4                    | 2.0                     | 800                      |
| GPe        | GABA     | 2                    | 2.0                     | 2000                     |
| STN        | AMPA     | 4.45                 | 1.65                    | 800                      |
| Thalamus   | AMPA     | 2.2                  | 2.5                     | 800                      |

**Supplementary File 4. External inputs to CBGT nuclei.** Each nucleus is listed on the left, with mean external input frequency, efficacy, and number of connections listed by receptor.
