# Supplementary material for: Competing neural representations of choice shape evidence accumulation in humans
Source: eLife journal article supplement (doi:10.7554/elife.85223), 2023-10-11
Supplement: supp5 [file elife-85223-supp5-v2.pdf]

| Parameter            | Unit | Value  |
|----------------------|------|--------|
| $\tau_{\text{AMPA}}$ | ms   | 2      |
| $V_{\text{E}}$       | mV   | 0      |
| $\tau_{\text{NMDA}}$ | ms   | 100    |
| $\tau_{\text{GABA}}$ | ms   | 5      |
| $V_{\text{I}}$       | mV   | -70    |
| $\alpha$             | -    | 0.6332 |

**Supplementary File 5. Synaptic parameters.** Parameters for the simulated synapses.
