# Supplementary material for: Competing neural representations of choice shape evidence accumulation in humans
Source: eLife journal article supplement (doi:10.7554/elife.85223), 2023-10-11
Supplement: supp6 [file elife-85223-supp6-v2.pdf]

| Connection Type | Connection Prob. | g (nS) | Receptor |
|-----------------|------------------|--------|----------|
| Cx-dSPN         | 1.0              | 0.015  | AMPA     |
| Cx-dSPN         | 1.0              | 0.02   | NMDA     |
| Cx-iSPN         | 1.0              | 0.015  | AMPA     |
| Cx-iSPN         | 1.0              | 0.02   | NMDA     |
| Cx-FSI          | 1.0              | 0.43   | AMPA     |
| Cx-Th           | 1.0              | 0.025  | AMPA     |
| Cx-Th           | 1.0              | 0.035  | NMDA     |
| Cx-Cx           | 0.13             | 0.0127 | AMPA     |
| Cx-Cx           | 0.13             | 0.08   | NMDA     |
| Cx-CxI          | 0.0725           | 0.113  | AMPA     |
| Cx-CxI          | 0.0725           | 0.525  | NMDA     |
| CxI-Cx          | 0.5              | 1.05   | GABA     |
| CxI-CxI         | 1.0              | 1.075  | GABA     |
| dSPN-dSPN       | 0.45             | 0.28   | GABA     |
| dSPN-iSPN       | 0.45             | 0.28   | GABA     |
| dSPN-GPi        | 1.0              | 2.09   | GABA     |
| iSPN-iSPN       | 0.45             | 0.28   | GABA     |
| iSPN-dSPN       | 0.5              | 0.28   | GABA     |
| iSPN-GPe        | 1.0              | 4.07   | GABA     |
| FSI-FSI         | 1.0              | 3.2583 | GABA     |
| FSI-dSPN        | 1.0              | 1.77   | GABA     |
| FSI-iSPN        | 1.0              | 1.66   | GABA     |
| GPe-GPe         | 0.067            | 1.75   | GABA     |
| GPe-STN         | 0.067            | 0.35   | GABA     |
| GPe-GPi         | 1.0              | 0.058  | GABA     |
| STN-GPe         | 0.1617           | 0.07   | AMPA     |
| STN-GPe         | 0.1617           | 1.51   | NMDA     |
| STN-GPi         | 1.0              | 0.038  | GABA     |
| GPi-Th          | 1.0              | 0.033  | GABA     |
| Th-dSPN         | 1.0              | 0.38   | AMPA     |
| Th-iSPN         | 1.0              | 0.38   | AMPA     |
| Th-FSI          | 0.83             | 0.1    | AMPA     |
| Th-Cx           | 0.83             | 0.03   | NMDA     |
