# Supplementary material for: Competing neural representations of choice shape evidence accumulation in humans
Source: eLife journal article supplement (doi:10.7554/elife.85223), 2023-10-11
Supplement: supp7 [file elife-85223-supp7-v2.pdf]

| Population | No. neurons |
|------------|-------------|
| Cx         | 204         |
| CxI        | 186         |
| dSPN       | 75          |
| iSPN       | 75          |
| FSI        | 75          |
| GPe        | 750         |
| GPi        | 75          |
| STN        | 750         |
| Th         | 75          |

**Supplementary File 7. Number of neurons in each CBGT population.**
