# Supplementary material for: Competing neural representations of choice shape evidence accumulation in humans
Source: eLife journal article supplement (doi:10.7554/elife.85223), 2023-10-11
Supplement: supp8 [file elife-85223-supp8-v2.pdf]

| Parameter         | Value |
|-------------------|-------|
| $\Delta_{PRE}$    | 0.8   |
| $\Delta_{POST}$   | 0.04  |
| $\tau_{PRE}$      | 15    |
| $\tau_{POST}$     | 6     |
| $\tau_E$          | 100   |
| $\alpha_{w-dSPN}$ | 39.5  |
| $\alpha_{w-iSPN}$ | -38.2 |
| $W_{max}^{dSPN}$  | 0.055 |
| $W_{max}^{iSPN}$  | 0.035 |
| $W_{min}$         | 0.001 |
| $c$               | 2.5   |
| $\tau_{DOP}$      | 2.0   |
| $\alpha_q$        | 0.6   |
| $C_{scale}$       | 85    |

**Supplementary File 8. STDP parameters.**
